# Supplementary material for: A novel structure for enhancing the sensitivity of gas sensors – α-Fe2O3 nanoropes containing a large amount of grain boundaries and their excellent ethanol sensing performance
Source: Royal Society of Chemistry journal article supplement (doi:10.1039/c4ta06861k), 2015-01-01
Supplement: c4ta06861k1.pdf [file c4ta06861k1.pdf]

**Supporting information for**  
**A novel structure of sensitivity enhancement for gas sensors**  
**——  $\alpha$ -Fe<sub>2</sub>O<sub>3</sub> nanoropes containing**  
**large amount of grain boundaries and their excellent ethanol**  
**sensing performance**

***AUTHOR NAMES***

*Shuang Yan, Qingsheng Wu\**

**AUTHOR ADDRESS**

Department of Chemistry, Key Laboratory of Yangtze River Water Environment, Ministry of Education, Tongji University, Shanghai, 200092, China

**Corresponding Author:** Qingsheng Wu

E-mail: qswu@tongji.edu.cn

Tel: +86 21 65982620

Address: Department of Chemistry, Tongji University, Siping Road 1239, Shanghai, 200092, China

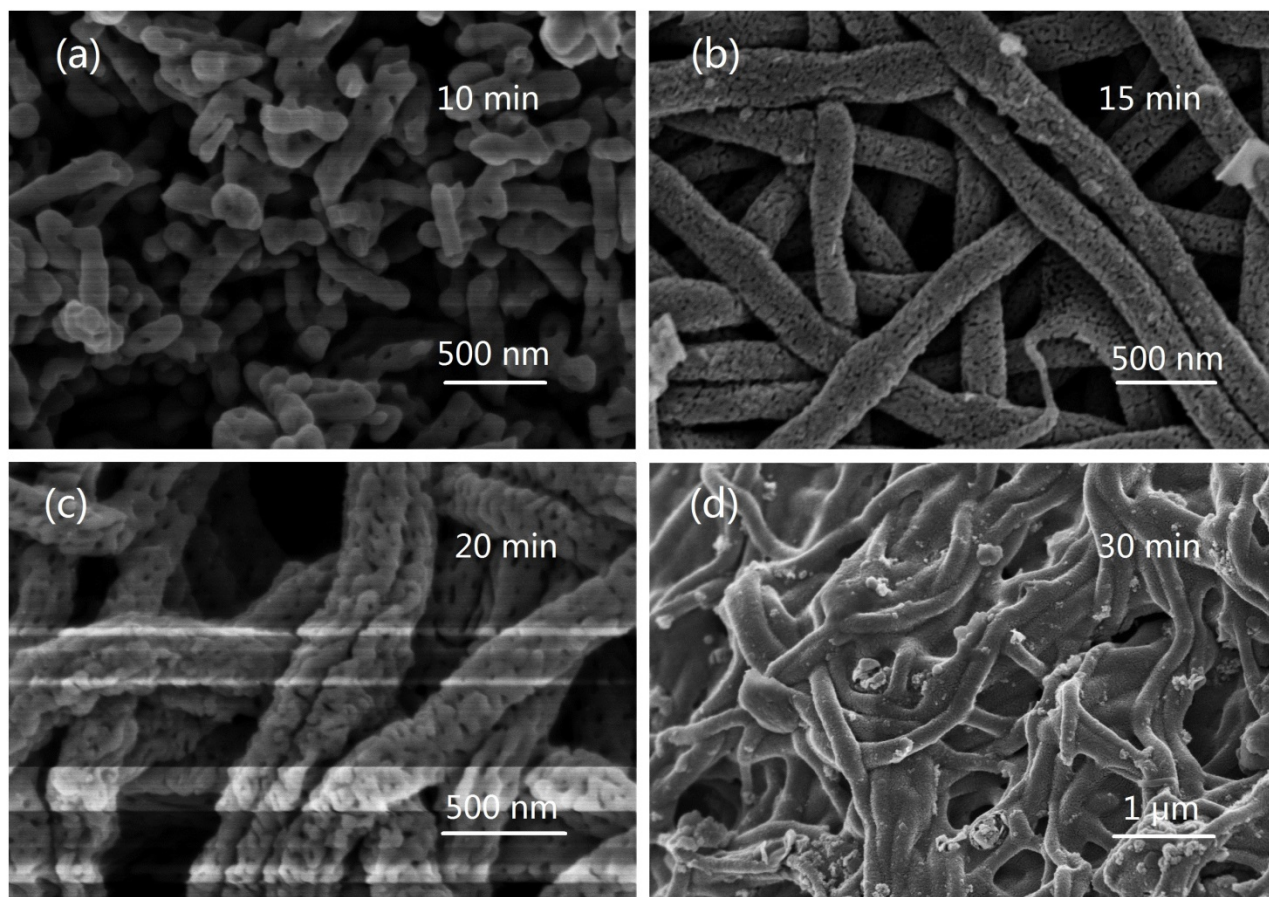

Figure S1. SEM images of  $\text{Fe}_2\text{O}_3$  nanofibers calcined at  $600^\circ\text{C}$  in air from the precursor of A-PAN-Fe with the different immersion time (a) 10 min, (b) 15 min, (c) 20 min and (d) 30 min.

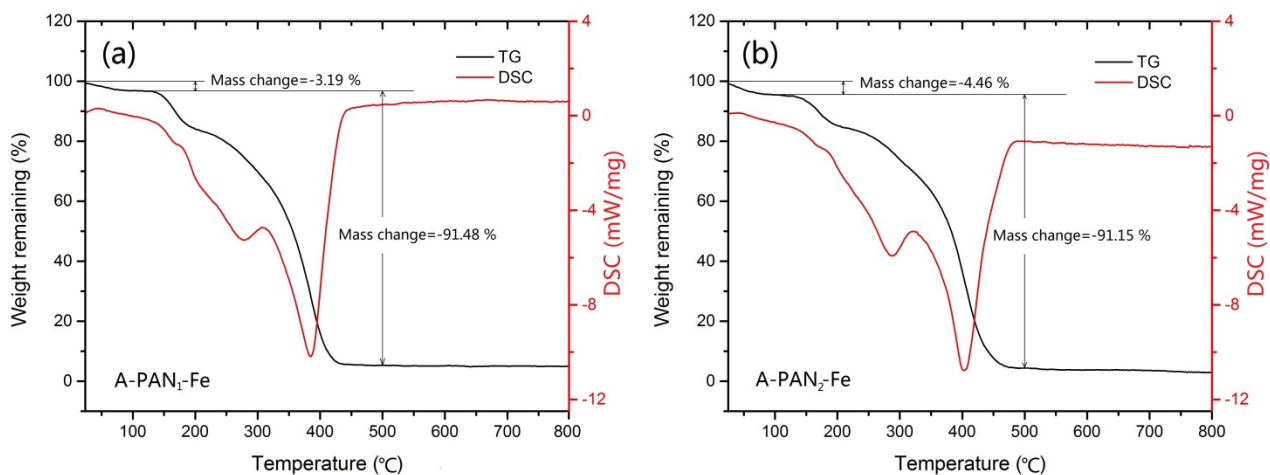

Figure S2. TG-DSC analysis of the (a) A-PAN<sub>1</sub>-Fe and (b) A-PAN<sub>2</sub>-Fe.

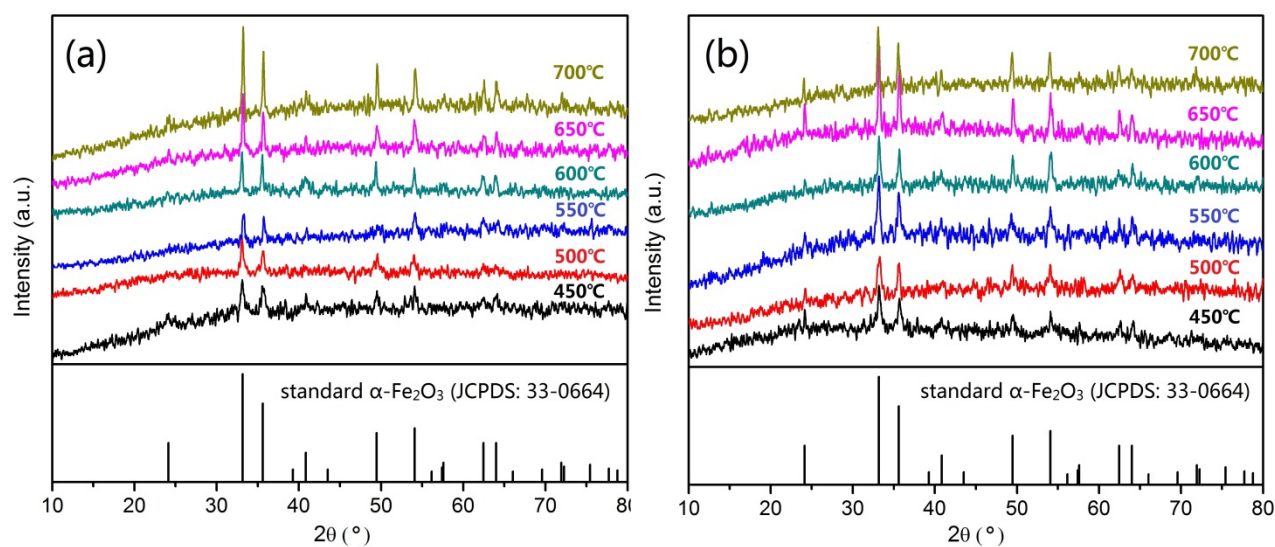

Fig. S3 XRD diffraction patterns of samples calcined at various temperatures (450, 500, 550, 600, 650 and 700 °C) from (a) A-PAN<sub>1</sub>-Fe and (b) A-PAN<sub>2</sub>-Fe compared to the standard pattern of  $\alpha$ -Fe<sub>2</sub>O<sub>3</sub>.

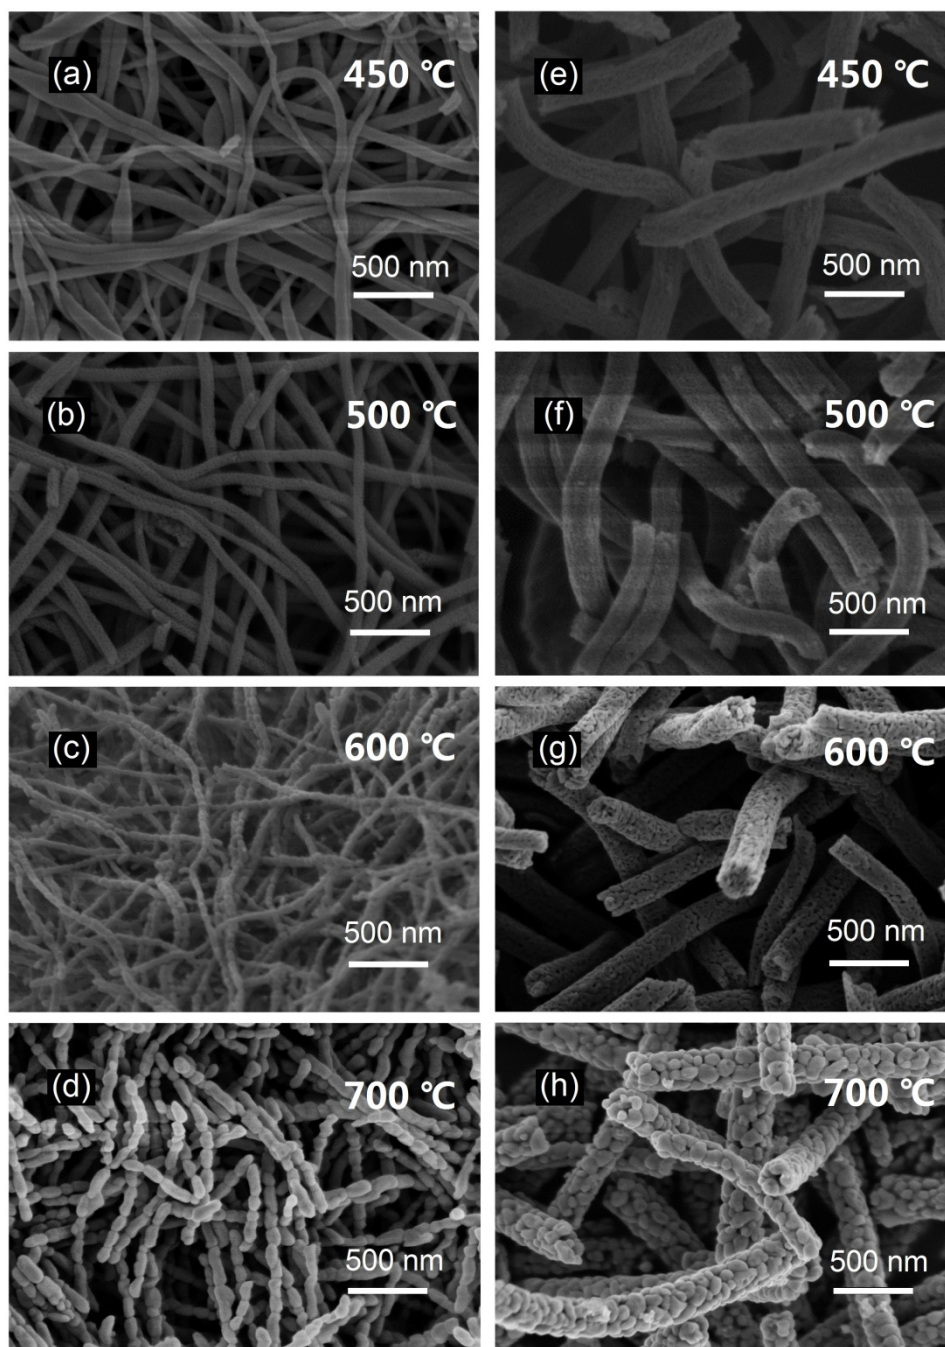

Figure S4. SEM images of the  $\alpha$ -Fe<sub>2</sub>O<sub>3</sub> nanostrings (a-d) and nanoropes (e-h) after calcination at various temperatures from 450-700 °C for 1 h in air.

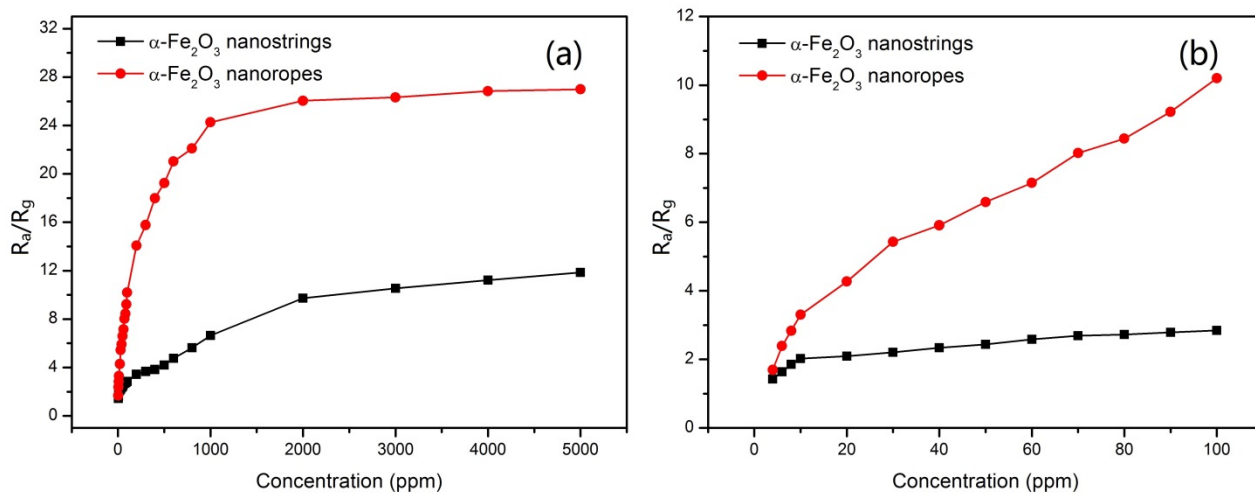

Figure S5. Response of  $\alpha\text{-Fe}_2\text{O}_3$  nanostrings and nanoropes to different concentrations of  $\text{C}_2\text{H}_5\text{OH}$  (a) 4-5000 ppm and (b) 4-100 ppm at  $240^\circ\text{C}$ .

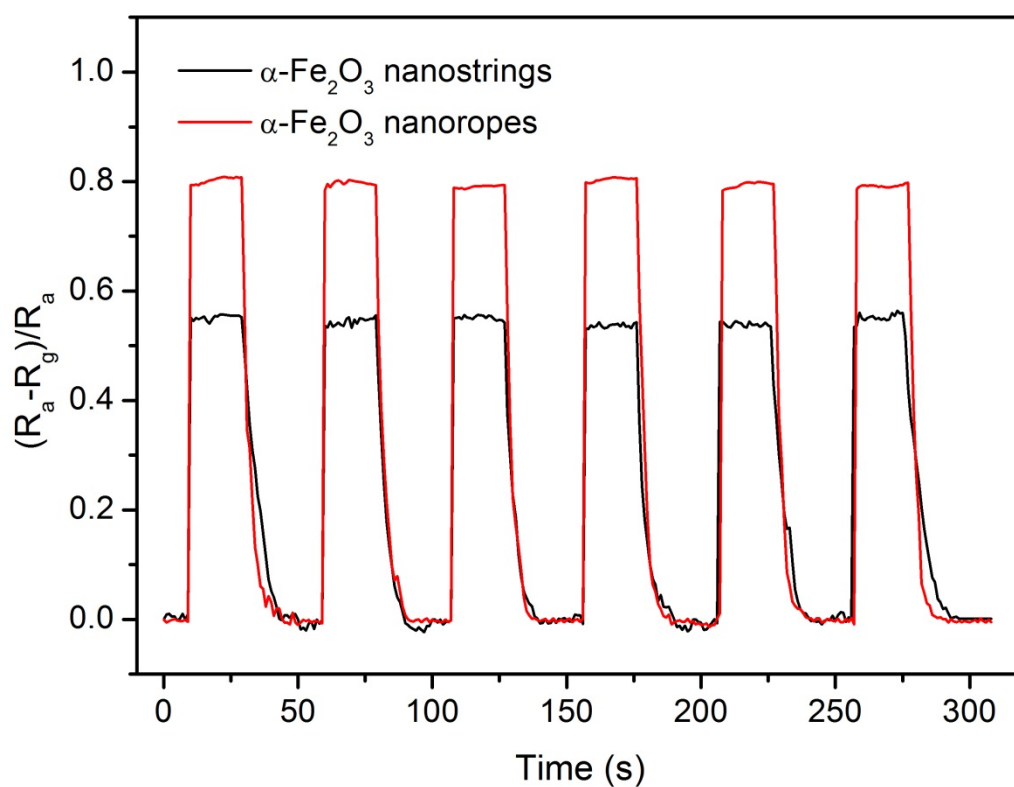

Figure S6. Cyclic sensing and recovery performance of  $\alpha\text{-Fe}_2\text{O}_3$  nanostrings and nanoropes to 100 ppm  $\text{C}_2\text{H}_5\text{OH}$  at  $260^\circ\text{C}$ .
